# Supplementary material for: Cross-Correlated Motions in Azidolysozyme
Source: MDPI journal article supplement (doi:10.3390/molecules27030839), 2022-01-27
Supplement: s1 [file s1]

# Supporting Information: Cross-Correlated Motions in Azidolysozyme

Seyedeh Maryam Salehi and Markus Meuwly\*

*Department of Chemistry, University of Basel, Klingelbergstrasse 80 , CH-4056 Basel,  
Switzerland.*

E-mail: m.meuwly@unibas.ch

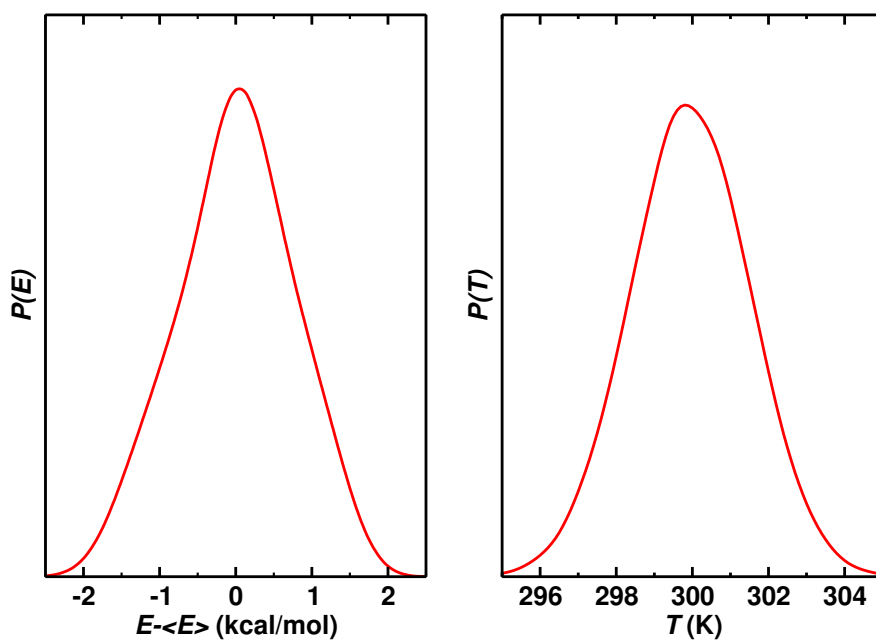

Figure S1: Energy conservation (left panel) and temperature distribution (right panel) from 2 ns RKHS-based  $NVE$  simulations of modified lysozyme at position Ala92.

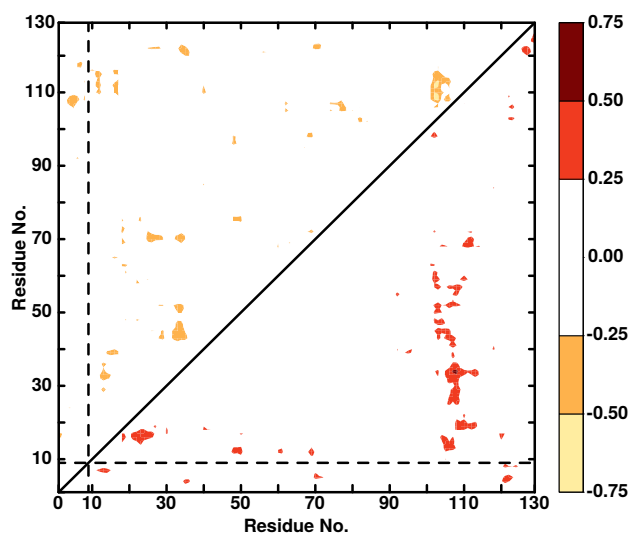

Figure S2:  $\Delta$ DCCM between WT and Ala9N<sub>3</sub>. Positive differences are in the lower right triangle, negative differences in the upper left triangle. Only differences with an absolute value greater than 0.25 are displayed.

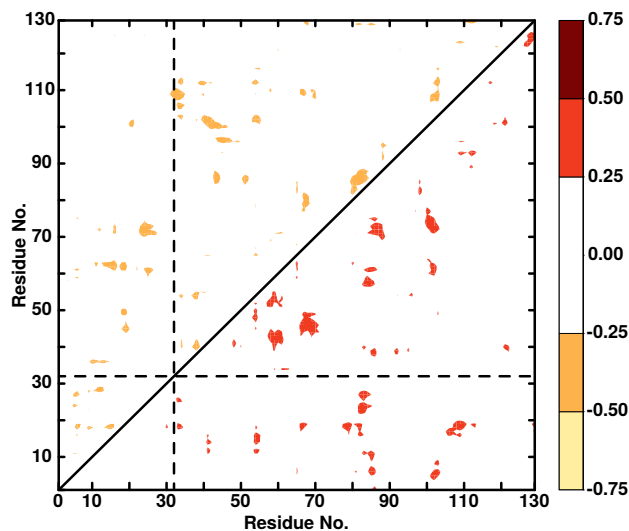

Figure S3:  $\Delta$ DCCM between WT and Ala32N<sub>3</sub>. Positive differences are in the lower right triangle, negative differences in the upper left triangle. Only differences with an absolute value greater than 0.25 are displayed.

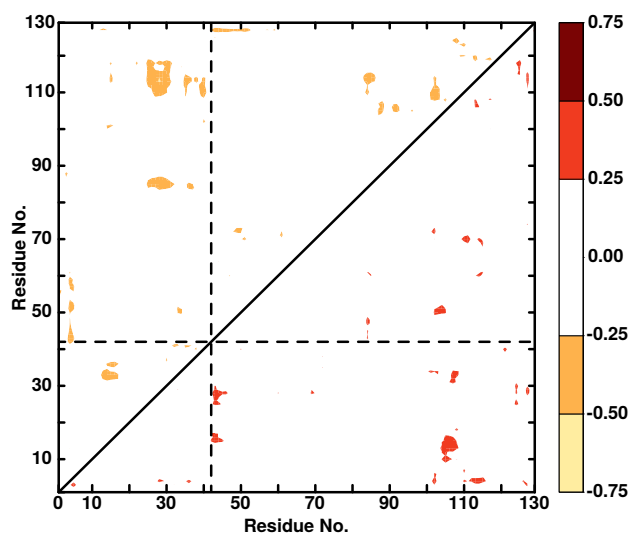

Figure S4:  $\Delta$ DCCM between WT and Ala42N<sub>3</sub>. Positive differences are in the lower right triangle, negative differences in the upper left triangle. Only differences with an absolute value greater than 0.25 are displayed.

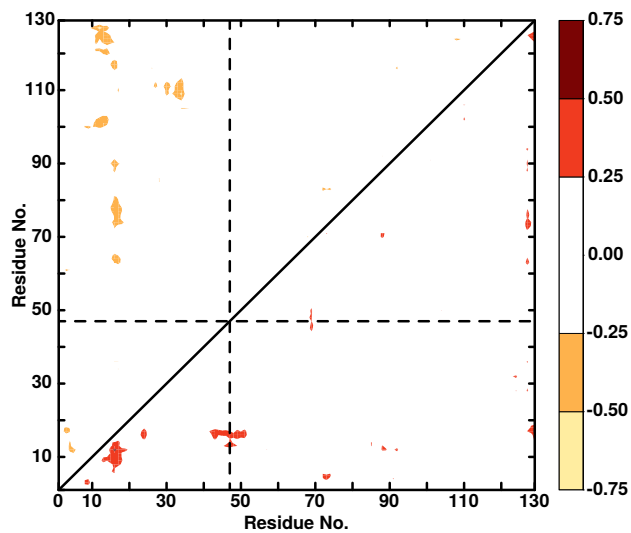

Figure S5:  $\Delta$ DCCM between WT and Ala47N<sub>3</sub>. Positive differences are in the lower right triangle, negative differences in the upper left triangle. Only differences with an absolute value greater than 0.25 are displayed.

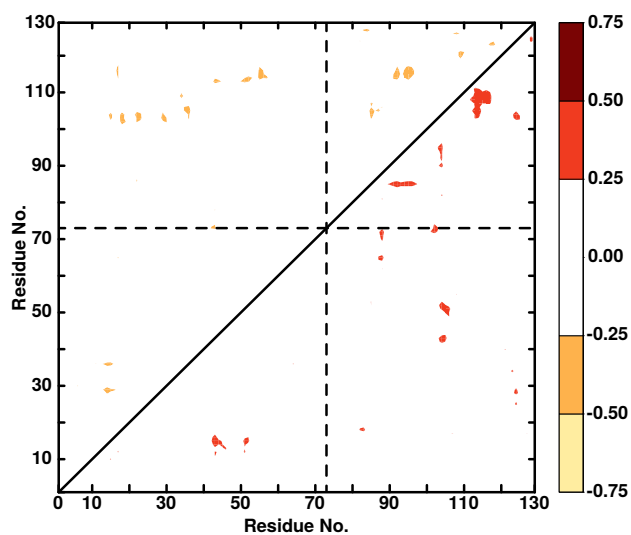

Figure S6:  $\Delta$ DCCM between WT and Ala73N<sub>3</sub>. Positive differences are in the lower right triangle, negative differences in the upper left triangle. Only differences with an absolute value greater than 0.25 are displayed.

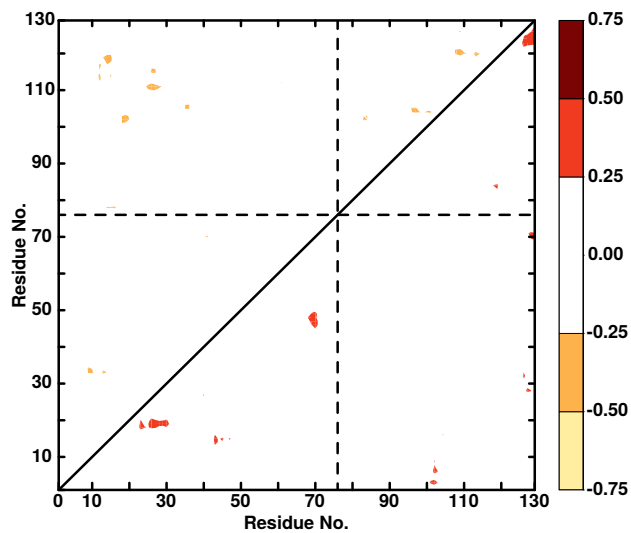

Figure S7:  $\Delta$ DCCM between WT and Ala76N<sub>3</sub>. Positive differences are in the lower right triangle, negative differences in the upper left triangle. Only differences with an absolute value greater than 0.25 are displayed.

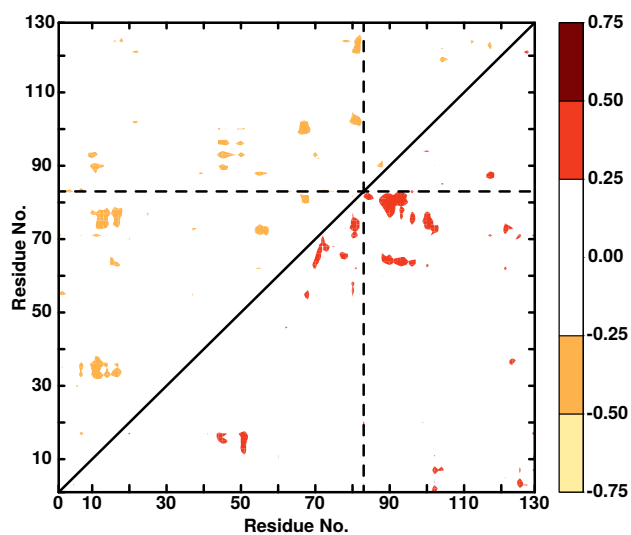

Figure S8:  $\Delta$ DCCM between WT and Ala83N<sub>3</sub>. Positive differences are in the lower right triangle, negative differences in the upper left triangle. Only differences with an absolute value greater than 0.25 are displayed.

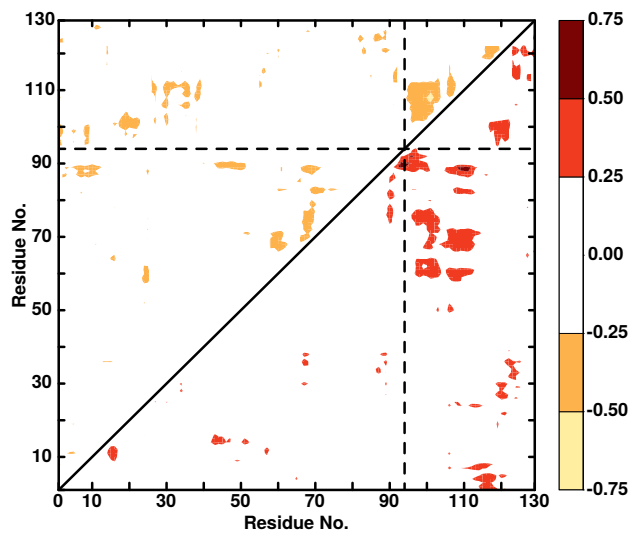

Figure S9:  $\Delta$ DCCM between WT and Ala94N<sub>3</sub>. Positive differences are in the lower right triangle, negative differences in the upper left triangle. Only differences with an absolute value greater than 0.25 are displayed.

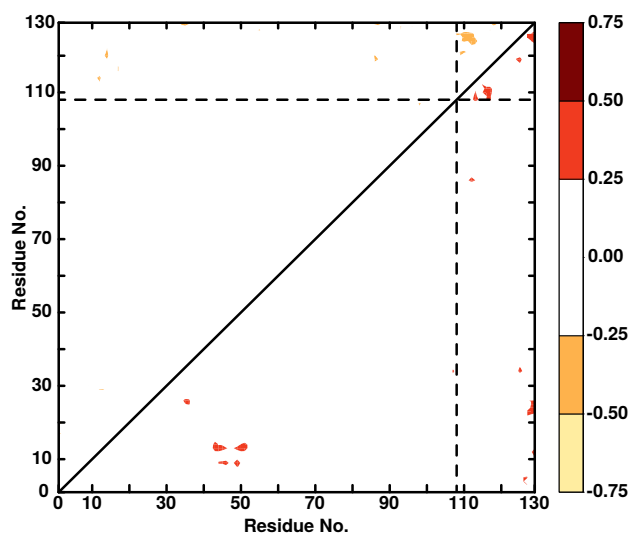

Figure S10:  $\Delta$ DCCM between WT and Ala108N<sub>3</sub>. Positive differences are in the lower right triangle, negative differences in the upper left triangle. Only differences with an absolute value greater than 0.25 are displayed.

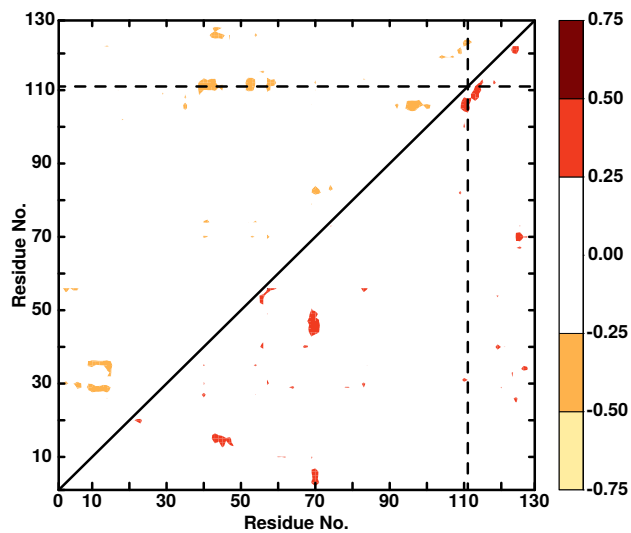

Figure S11:  $\Delta$ DCCM between WT and Ala111N<sub>3</sub>. Positive differences are in the lower right triangle, negative differences in the upper left triangle. Only differences with an absolute value greater than 0.25 are displayed.

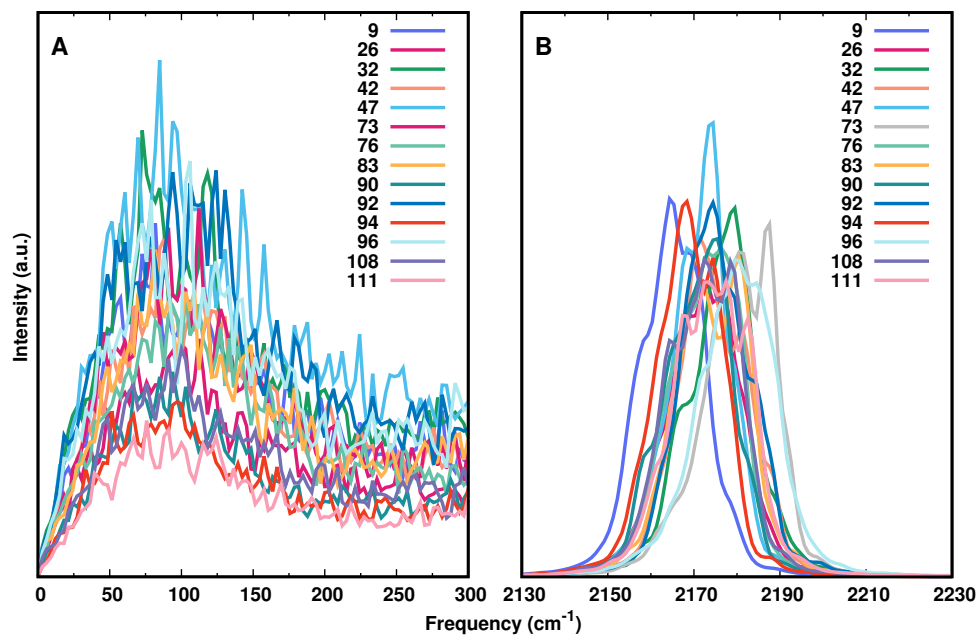

Figure S12: IR spectrum obtained from Fourier Transform of the dipole moment auto-correlation function of protein (panel A) and -N<sub>3</sub> label (panel B) for all AlaN<sub>3</sub> modifications. The labels in each panel refer to the alanine residue that carries the -N<sub>3</sub> moiety.

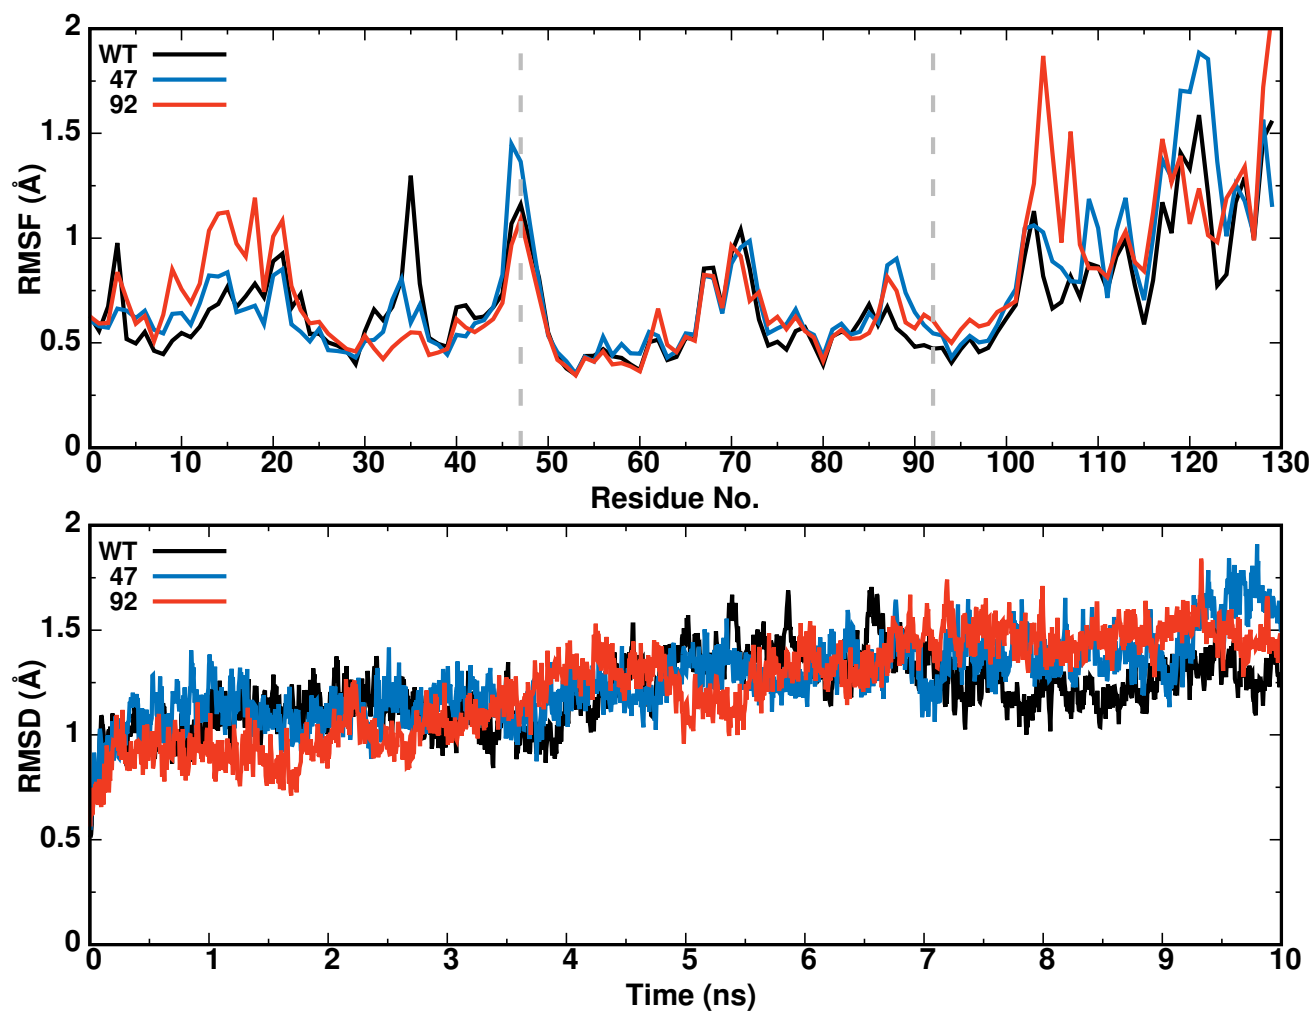

Figure S13: Root mean squared fluctuations (top) and root mean squared deviation (bottom) for the  $C_{\alpha}$  atoms of the WT, Ala47N<sub>3</sub> and Ala92N<sub>3</sub> protein from 10 ns RKHS-based simulations. The dashed lines in top panel show the positions of the modified Ala residues.



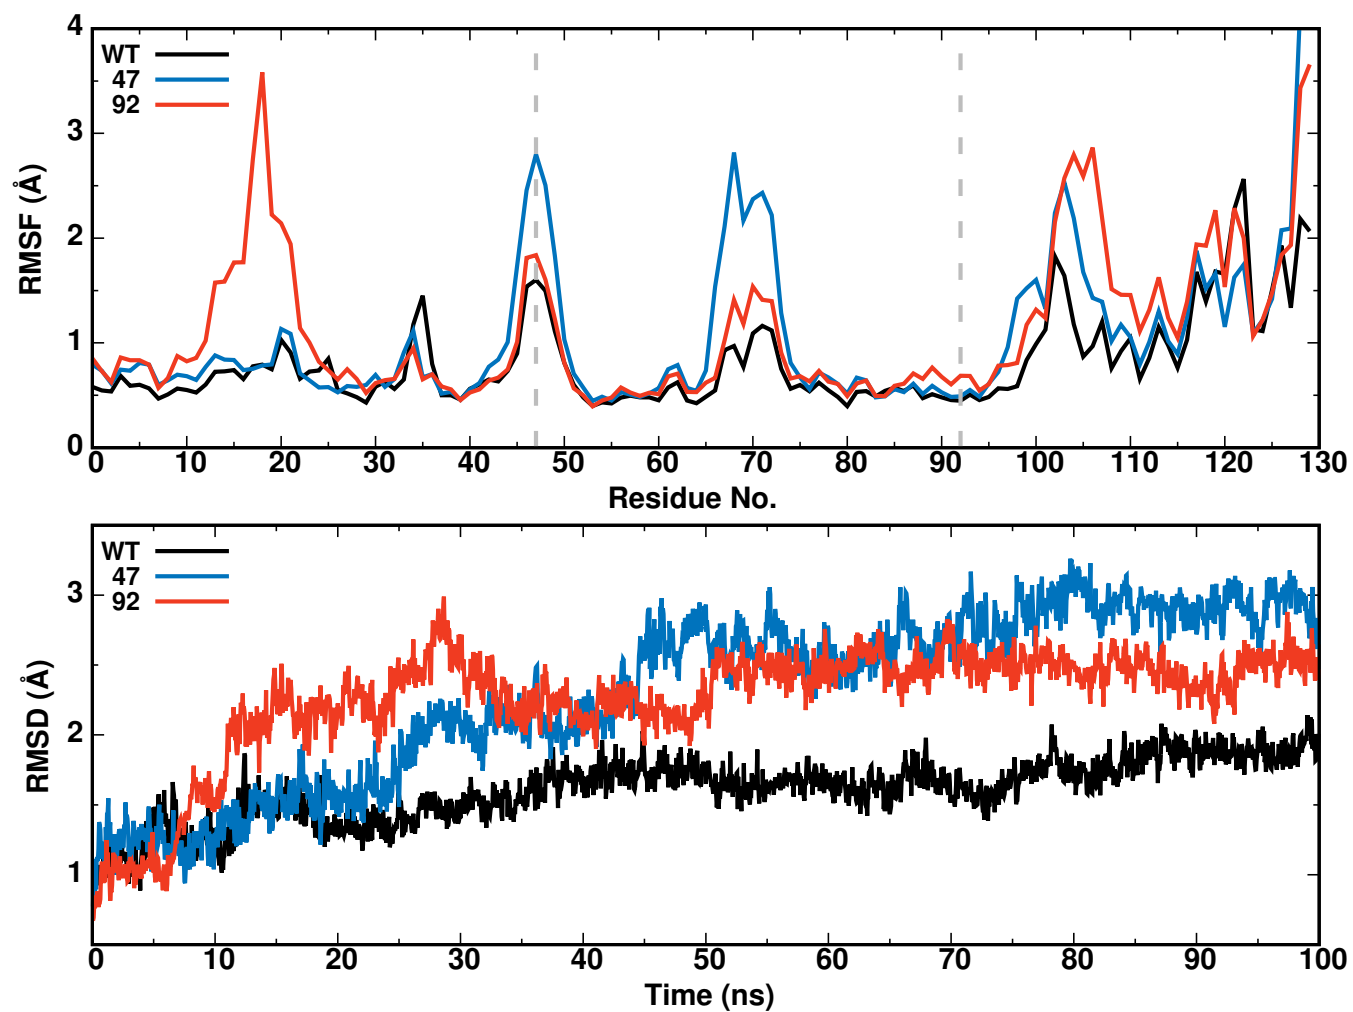

Figure S14: Root mean squared fluctuations (top) and root mean squared deviation (bottom) for the  $C_{\alpha}$  atoms of the WT, Ala47N<sub>3</sub> and Ala92N<sub>3</sub> protein from 100 ns conventional force field simulations. The dashed lines in top panel show the positions of the modified Ala residues.

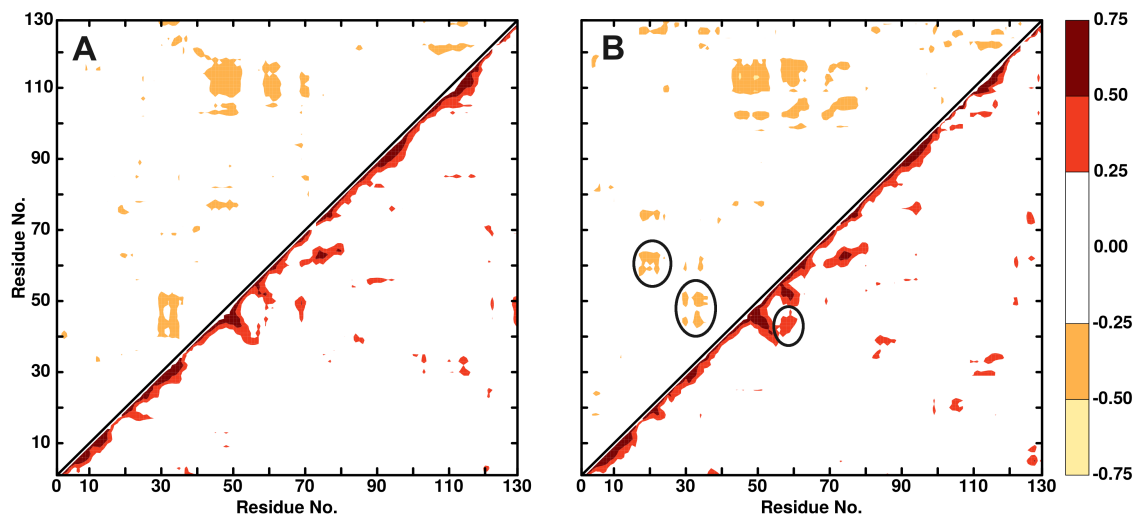

Figure S15: DCCM maps for WT lysozyme from A) 10 ns and B) 100 ns conventional force field simulations. Positive correlations are in the lower right triangle, negative correlations in the upper left triangle. Only correlation coefficients with an absolute value greater than 0.25 are displayed. Notable differences are encircled in panel B.

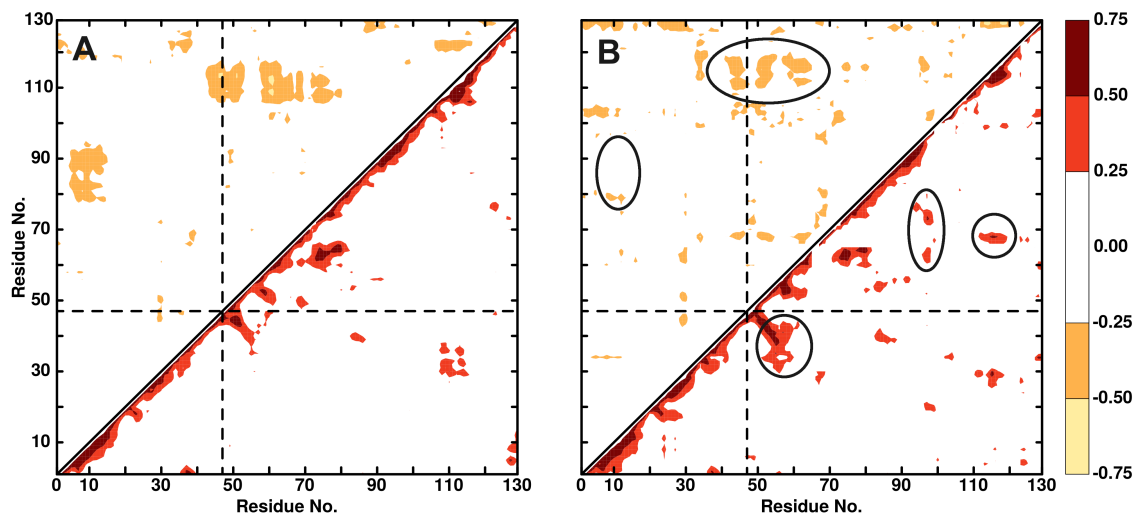

Figure S16: DCCM maps for Ala47N<sub>3</sub> from A) 10 ns RKHS-based and B) 100 ns conventional force field simulations. Positive correlations are in the lower right triangle, negative correlations in the upper left triangle. Only correlation coefficients with an absolute value greater than 0.25 are displayed. Notable differences are encircled in panel B.

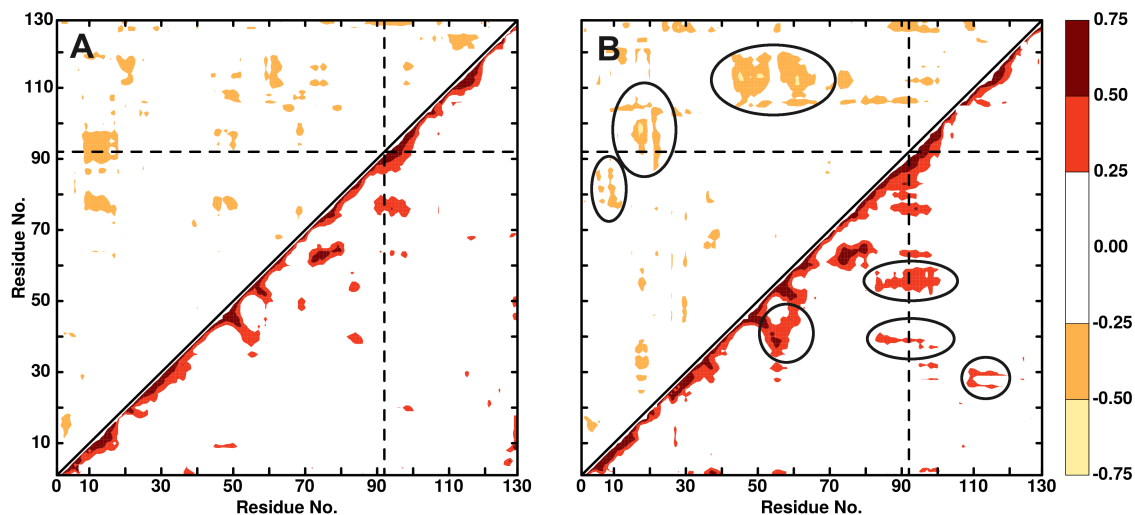

Figure S17: DCCM maps for Ala92N<sub>3</sub> from A) 10 ns RKHS-based and B) 100 ns conventional force field simulations. Positive correlations are in the lower right triangle, negative correlations in the upper left triangle. Only correlation coefficients with an absolute value greater than 0.25 are displayed. Notable differences are encircled in panel B.
